# Supplementary material
Source: PubMed Central journal article supplement (PMC3963578)
Supplement: supp_tpc.113.118935_tpc118935Supplemental.pdf [file supp_tpc.113.118935_tpc118935Supplemental.pdf]

***ABCG9* (AT4G27420)**

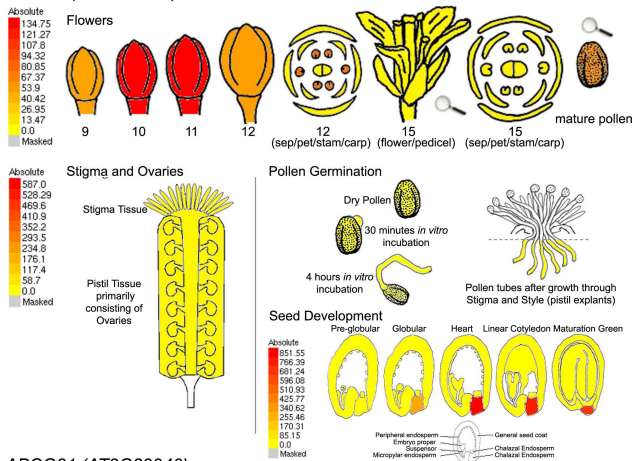

***ABCG31* (AT2G29940)**

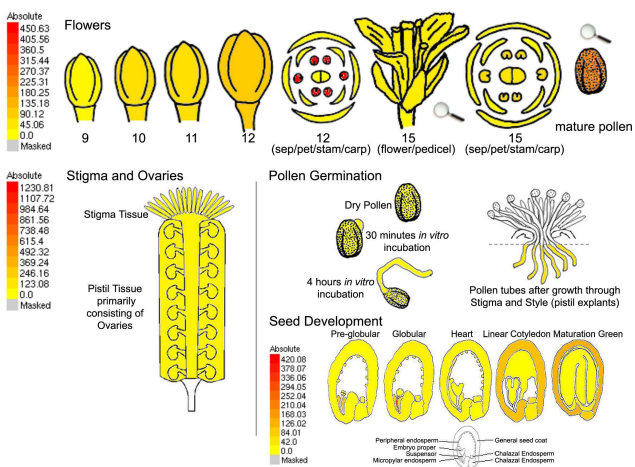

**Supplemental Figure 1. Expression patterns of *ABCG9* and *ABCG31* in flowers and developing seeds, according to the BAR Arabidopsis eFP browser.**

The expression values of *ABCG9* and *ABCG31* in developing flowers, developing pollen grains, stigmas and ovaries, dry or germinating pollen grains, and developing seeds were obtained from a public microarray database, the BAR Arabidopsis eFP browser (<http://bar.utoronto.ca/efp/cgi-bin/efpWeb.cgi>).

A

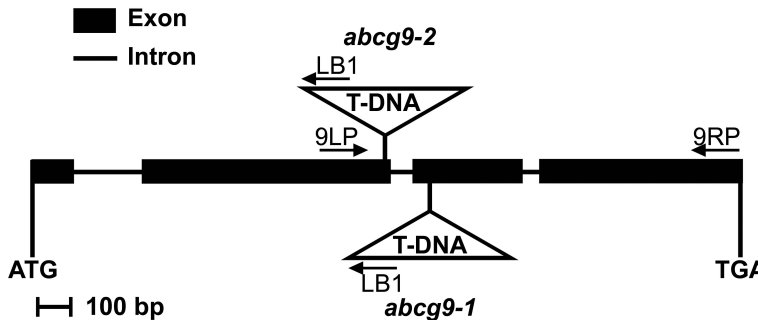

B

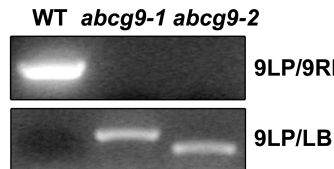

C

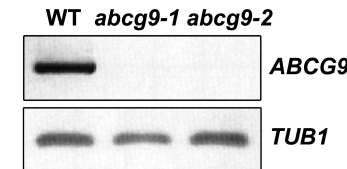

### Supplemental Figure 2. Isolation of *abcg9* knockout mutant plants.

(A) Structure of *ABCG9*, with the positions of the T-DNA insertion sites indicated by flags. Exons and introns are denoted by black boxes and lines, respectively. Arrows indicate the positions of primers. (B) Genomic DNA-PCR analysis of *ABCG9*. Total genomic DNA was extracted from the rosette leaves of wild-type, *abcg9-1*, and *abcg9-2* plants. (C) Reverse transcriptase (RT)-PCR analysis of *ABCG9* expression. Total RNA was extracted from the flowers of wild-type, *abcg9-1*, and *abcg9-2* plants.  $\beta$ -*tubulin* (*TUB1*) was used as an internal control.

A

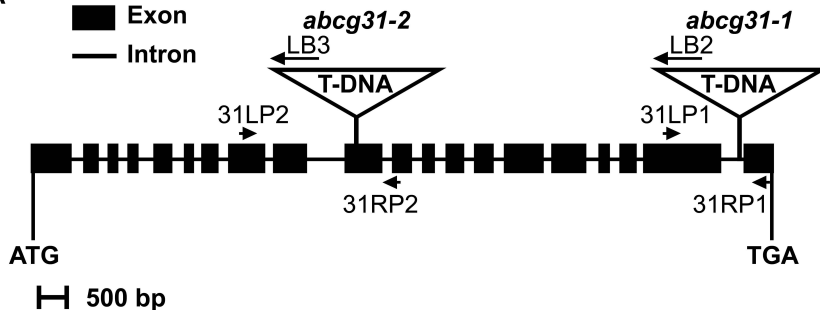

B

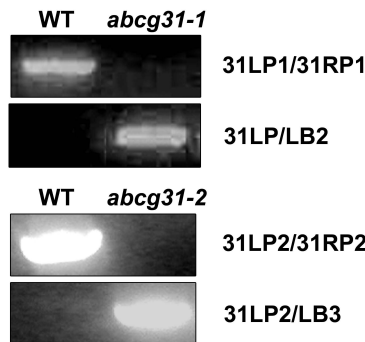

C

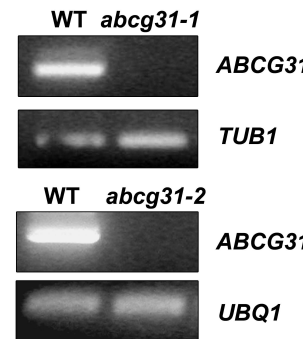

### Supplemental Figure 3. Isolation of *abcg31* knockout mutant plants.

(A) Structure of *ABCG31*, with the positions of the T-DNA insertion sites indicated by flags. Exons and introns are denoted by black boxes and lines, respectively. Arrows indicate the positions of primers. (B) Genomic DNA-PCR analysis of *ABCG31*. Total genomic DNA was extracted from the rosette leaves of wild-type, *abcg31-1*, and *abcg31-2* plants. (C) RT-PCR analysis of *ABCG31* expression. Total RNA was extracted from the flowers of wild-type, *abcg31-1*, and *abcg31-2* plants. *β-tubulin* (*TUB1*) and *ubiquitin* (*UBQ1*) were used as internal controls for *abcg31-1* and *abcg31-2*, respectively.

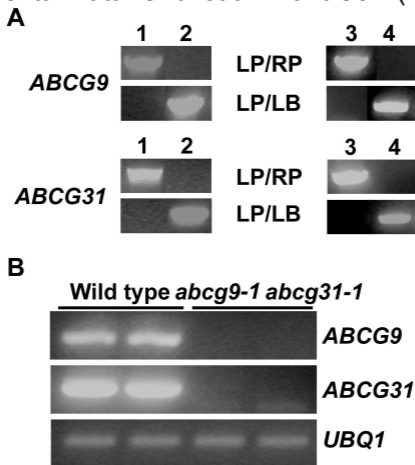

**Supplemental Figure 4. Isolation of *abcg9 abcg31* double knockout mutant plants.**

(A) Genomic DNA-PCR analysis of *ABCG9* and *ABCG31* in *abcg9-1 abcg31-1* and *abcg9-1 abcg31-2* plants. Total genomic DNA was extracted from the rosette leaves of wild-type (lanes 1 and 3), *abcg9-1 abcg31-1* (lane 2), and *abcg9-1 abcg31-2* (lane 4) plants. (B) RT-PCR analysis of *ABCG9* and *ABCG31* expression in the *abcg9-1 abcg31-1* mutant. Total RNA was extracted from the flowers of wild-type and *abcg9-1 abcg31-1* plants. *Ubiquitin (UBQ1)* was used as an internal control.

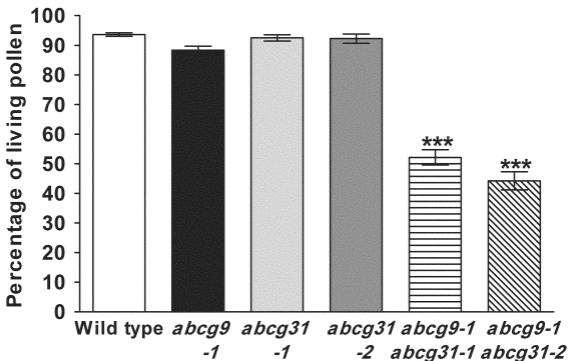

**Supplemental Figure 5. Reduced pollen viability of *abcg9-1 abcg31-2* plants.**

Pollen was collected from 4~5-week-old wild-type, *abcg9-1*, *abcg31-1*, *abcg31-2*, *abcg9-1 abcg31-1*, and *abcg9-1 abcg31-2* plants, and pollen viability was examined as described in Figure 2. The results from 29 (wild type, *abcg9-1*, and *abcg9-1 abcg31-1*), 16 (*abcg31-1*), 13 (*abcg31-2*), and 26 (*abcg9-1 abcg31-2*) flowers were combined. Data represent the means  $\pm$  SE of two biological replicates. Statistical comparison was performed using one-way ANOVA followed by Tukey's multiple comparison test. \*\*\*:  $P < 0.001$  (compared to the wild type, *abcg9-1*, *abcg31-1*, and *abcg31-2*).

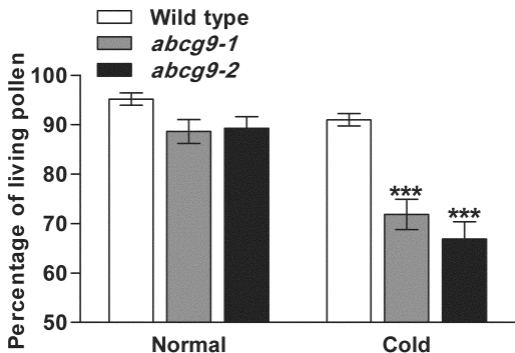

**Supplemental Figure 6. Reduced pollen viability of *abcg9* plants after cold shock.**

Pollen viability of wild-type and *abcg9* plants under normal growth conditions and after cold shock. For cold shock treatment, four-week-old plants were incubated at 4°C for three days, and pollen viability was examined as described in Figure 2. The results from 13 and 18 flowers were combined, respectively. Data represent the means  $\pm$  SE of two biological replicates. Statistical comparison was performed using one-way ANOVA followed by Tukey's multiple comparison test. \*\*\*:  $P < 0.001$  (compared to the wild type under normal or cold conditions, and *abcg9-1* and *abcg9-2* under normal conditions).

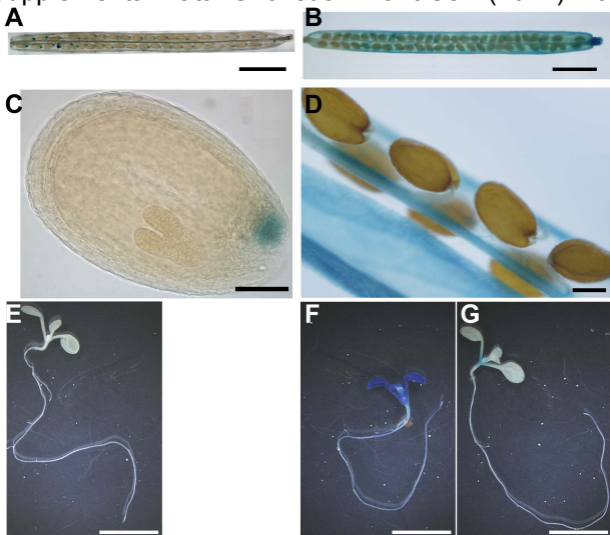

**Supplemental Figure 7. The pattern of *ABCG9* and *ABCG31* expression in tissues other than flowers.**

(A, B) GUS expression in a developing silique of a plant transformed with *ABCG9<sub>pro</sub>:GUS* (A) or *ABCG31<sub>pro</sub>:GUS* (B). Bars = 1 mm. (C) A developing seed from a *ABCG9<sub>pro</sub>:GUS* plant displaying GUS signal in the chalaza. Bar = 100  $\mu$ m. (D) No GUS expression was detected in the seeds of the *ABCG31<sub>pro</sub>:GUS* plant. Bar = 200  $\mu$ m. (E) to (G) GUS expression in 9-day-old seedlings transformed with *ABCG9<sub>pro</sub>:GUS* (E) or *ABCG31<sub>pro</sub>:GUS* (F, G). Bars = 0.5 mm. (E) No GUS expression was found in *ABCG9<sub>pro</sub>:GUS* seedlings. (F, G) GUS expression patterns in *ABCG31<sub>pro</sub>:GUS* seedlings. (F) Lines with higher expression exhibit signal mainly in the root vasculature and shoots. (G) Lines with lower expression exhibit signal only in the tips of the cotyledons and the basal parts of petioles.

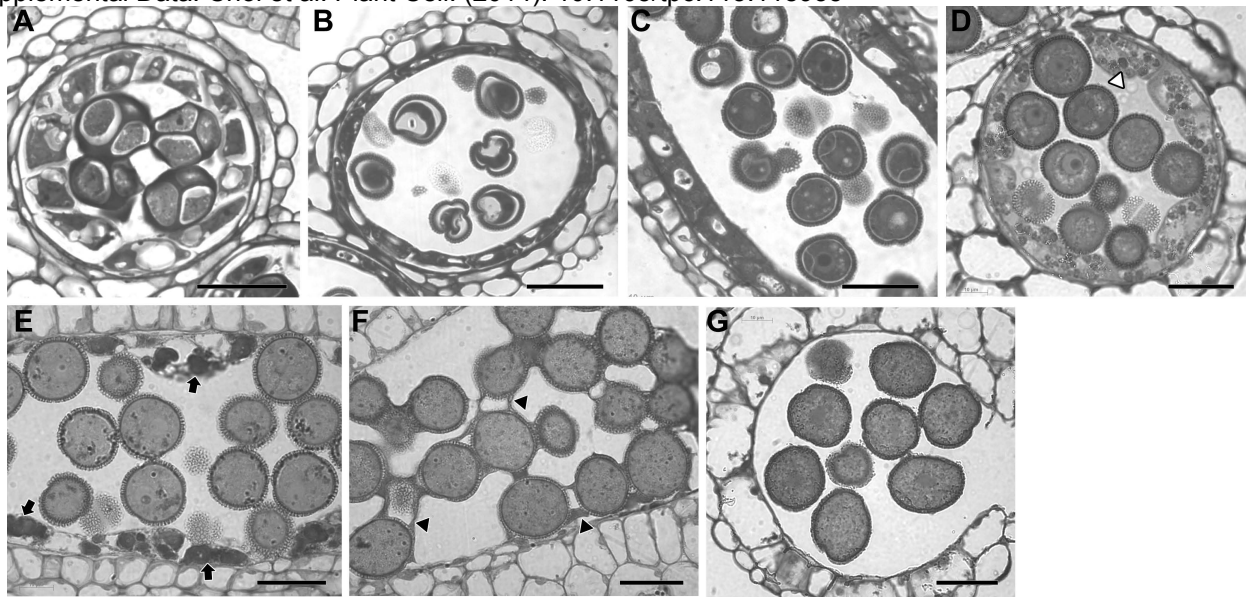

**Supplemental Figure 8. Normal pollen development in *abcg9-1 abcg31-1* plants.**

There was no visible defect in the pollen development of *abcg9-1 abcg31-1* plants. (A) Tetrads stage. (B) Vacuolate stage. (C) Mitosis I stage. (D) Bicellular stage. Lipidic compounds (arrowhead) accumulated in the tapetum. (E) Bi-/tri-cellular stage just prior to tapetal lysis. Tapetal cells are filled with an electron-dense substance, probably pollen coat materials (arrows). (F) Tricellular stage. Pollen coat materials released from the tapetum are deposited on the surface of pollen (arrowheads). (G) Mature stage. For pollen development in the wild type, see Figure 3 in Choi et al. (2010). Bars = 20  $\mu$ m.



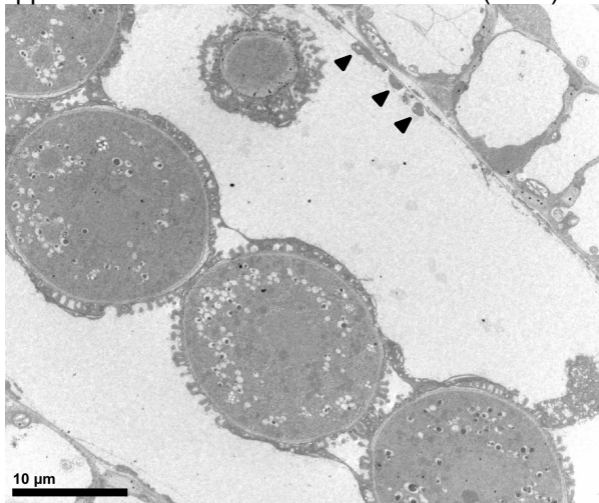

**Supplemental Figure 9. Wild-type pollen grains at the beginning of pollen coat deposition.** The tapetum is almost completely degraded (black arrowheads), and the pollen coat material released from the tapetum has not yet completely covered the surface of pollen grains. Bar = 10 μm.

**A**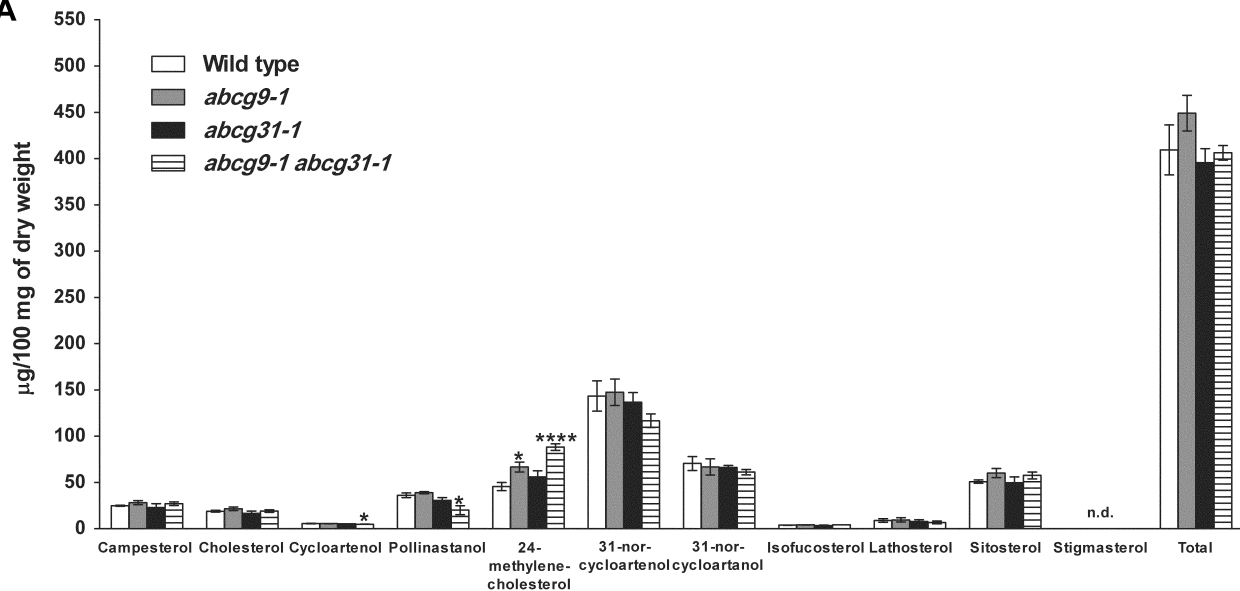**B**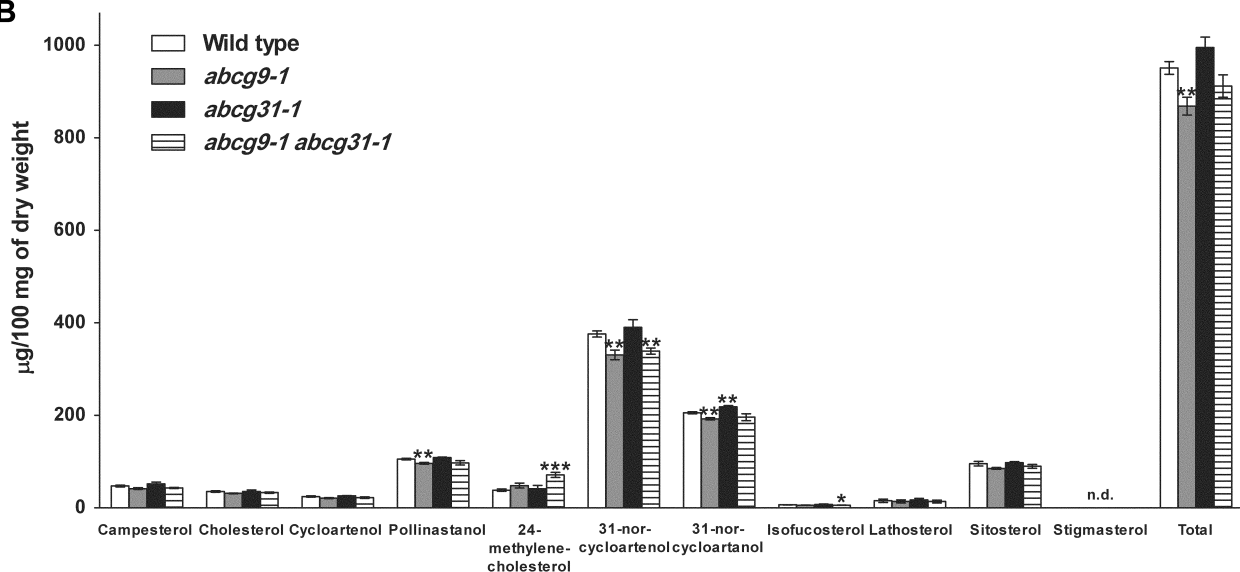

**Supplemental Figure 10. Free sterol and steryl ester contents in wild-type, *abcg9-1*, *abcg31-1*, and *abcg9-1 abcg31-1* pollen.**

Pollen was collected from 4-week-old wild-type, *abcg9-1*, *abcg31-1*, and *abcg9-1 abcg31-1* plants. Free sterol (A) and steryl ester (B) fractions were extracted, and separated according to sterol moiety using GC-MS. From about 50 mg of pollen sample, three independent lipid extractions and separations were executed. Data represent the means  $\pm$  SE of two biological replicates (Student's *t*-test, \*:  $P < 0.05$ , \*\*:  $P < 0.01$ , \*\*\*:  $P < 0.001$ , and \*\*\*\*:  $P < 0.0001$ ). n.d., not detected. Pollinastanol, 31-norcycloartenol, and 31-norcycloartenol are tentative compounds, which were deduced by a comparison of mass fragmentation patterns with those reported in previous studies (Wu et al., 1999).

A

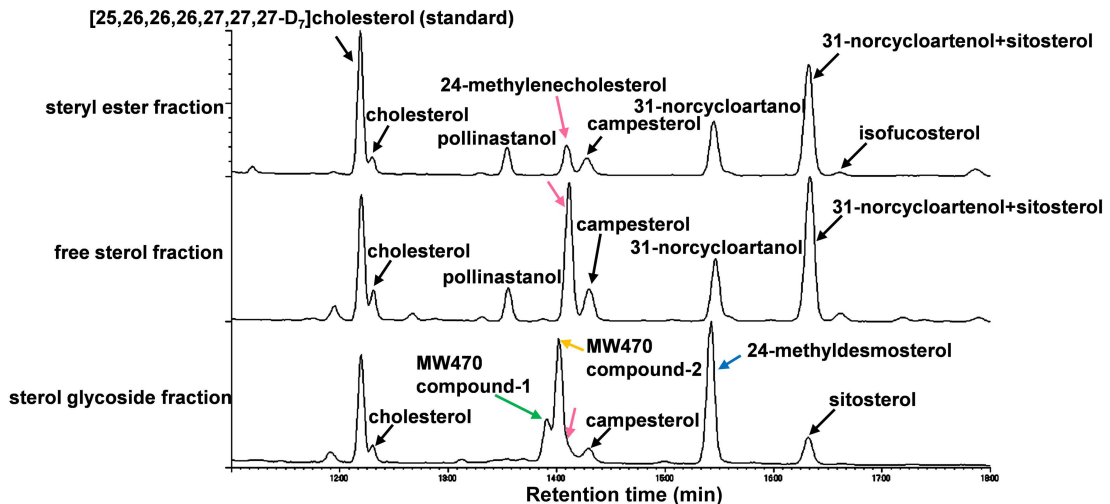

B

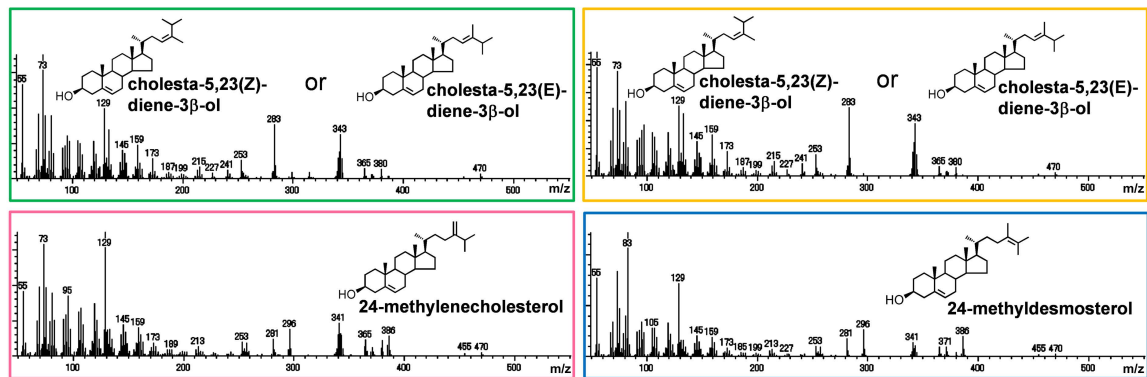

### Supplemental Figure 21. Identification of MW470 sterol compounds.

(A) Gas chromatogram from the pollen sterol analysis (Figure 7). MW470 compound-1 (green) and -2 (orange) are unidentified compounds with similar molecular weight to 24-methylenecholesterol (magenta). (B) Mass fragmentograms of MW470 compounds (MW470 compound-1, green; MW470 compound-2, orange; 24-methylenecholesterol, magenta; 24-methyldestmosterol, blue). MW470 compound-1 and -2 displayed the same mass fragmentations, which are different from that of 24-methylenecholesterol. A comparison of the mass fragmentation patterns with those in previous studies suggests that these compounds are cholesta-5,23(Z)-diene-3 $\beta$ -ol or cholesta-5,23(E)-diene-3 $\beta$ -ol (Wretensjö and Karlberg, 2002).

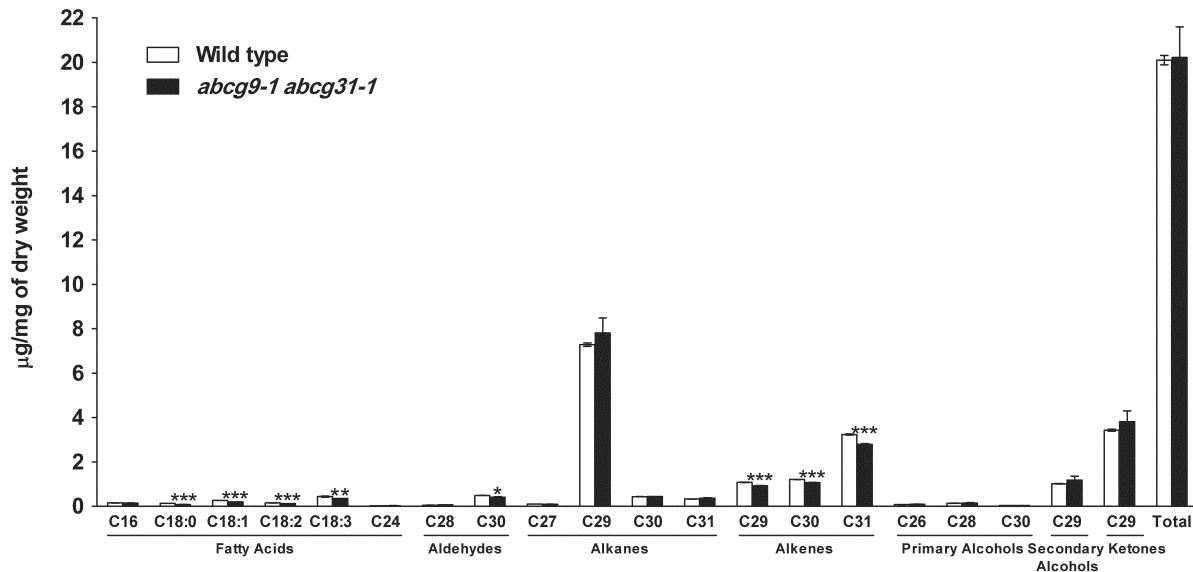

### Supplemental Figure 12. Wax content in wild-type and *abcg9-1 abcg31-1* pollen.

Pollen was collected from 4-week-old wild-type and *abcg9-1 abcg31-1* plants. From about 50 mg of pollen sample, three independent lipid extractions and separations were executed. Data represent the means  $\pm$  SE (Student's *t*-test, \*:  $P < 0.05$ , \*\*:  $P < 0.01$ , and \*\*\*:  $P < 0.001$ ).

Supplemental Table 1. Brassinosteroid content in wild-type and *abcg9-1 abcg31-1* pollen

| Brassinosteroids            | Wild type           | <i>abcg9-1 abcg31-1</i> |
|-----------------------------|---------------------|-------------------------|
| 6-Deoxocathasterone         | 3.20                | 2.75                    |
| 6-Deoxoteasterone           | n.d.                | n.d.                    |
| 3-Dehydro-6-deoxoteasterone | n.d.                | n.d.                    |
| 6-Deoxytyphasterol          | n.d.                | n.d.                    |
| 6-Deoxocastasterone         | 6.60                | 6.40                    |
| Cathasterone                | n.d.                | n.d.                    |
| Teasterone                  | 5.00                | 4.85                    |
| 3-Dehydroteasterone         | n.d.                | n.d.                    |
| Typhasterol                 | 18.0                | 17.5                    |
| Castasterone                | 44.0                | 41.0                    |
| Brassinolide                | 142                 | 127                     |
| <b>Total</b>                | 219                 | 199                     |
| <b>Unit</b>                 | pg/mg of dry weight |                         |

n.d., not detected.

Supplemental Table 2. Primers used in this study

| Isolation of knockout mutants                   |                                |                                                                     |
|-------------------------------------------------|--------------------------------|---------------------------------------------------------------------|
| <i>abcg9-1</i> and <i>abcg9-2</i>               | 9LP                            | 5'-ACCACTGCTCAAAGGATTGTGT-3'                                        |
|                                                 | 9RP                            | 5'-CCTCAGCCAGATTTGGTCTTACCA-3'                                      |
| <i>abcg31-1</i>                                 | 31LP1                          | 5'-TGTCTCTGAAACAGAACCT-3'                                           |
|                                                 | 31RP1                          | 5'-TGAAGTAAAGTGCAAATGCT-3'                                          |
| <i>abcg31-2</i>                                 | 31LP2                          | 5'-GAGTCTCTAGGATTCCGTCTC-3'                                         |
|                                                 | 31RP2                          | 5'-CCCTTGCTAG AGAAGCCATCA-3'                                        |
| T-DNA specific                                  | LB1                            | 5'-GCGTGGACCGCTTGCTGCAACT-3'                                        |
|                                                 | LB2                            | 5'-AACGTCCGCAATGTGTTATTAAGTTGTC-3'                                  |
|                                                 | LB3                            | 5'-ATAATAACGC TGCGGACATC TACATTTT-3'                                |
| <i>TUB1</i>                                     | TUB1-F                         | 5'-CTCACAGTCCCGGAGCTGACAC-3'                                        |
|                                                 | TUB1-R                         | 5'-GCTTCAGTGAAGTCCATCTCGT-3'                                        |
| <i>UBQ1</i>                                     | UBQ1-F                         | 5'-GCCAAGATCC AAGACAAAGA-3'                                         |
|                                                 | UBQ1-R                         | 5'-TTACGAGCAA GCATCATCAA-3'                                         |
| Promoter-GUS expression assay                   |                                |                                                                     |
| <i>ABCG9</i> promoter                           | Sal I - <i>ABCG9</i> proF      | 5'- <u>GTCGAC</u> -TCGAGAACCTACAAATAACAAGGT-3'                      |
|                                                 | Sma I - <i>ABCG9</i> proR      | 5'- <u>CCCGGG</u> -CCCCAACAAATGATCGATCTATAAAG-3'                    |
| <i>ABCG31</i> promoter                          | <i>ABCG31</i> Pro-F            | 5'-CTCATCTGGTAGACTGCTAA-3'                                          |
|                                                 | <i>ABCG31</i> Pro-R            | 5'-CTCCATACCAACTCTACGAA-3'                                          |
| Quantitative RT-PCR analysis                    |                                |                                                                     |
| <i>ABCG9</i>                                    | 9QRT-F                         | 5'-ATGGATAATCAAGAGGTTTCTATG-3'                                      |
|                                                 | 9QRT-R                         | 5'-TCATCTTGAGTCACGAAACCCG-3'                                        |
| <i>ABCG31</i>                                   | 31QRT-F                        | 5'-GGATCCTTCAGCTTTATGCAGA-3'                                        |
|                                                 | 31RP2                          | 5'-CCCTTGCTAGAGAAGCCATCA-3'                                         |
| <i>PP2A</i>                                     | PP2A/A3-qRT-F                  | 5'-TAACGTGGCCAAAATGATGC-3'                                          |
|                                                 | PP2A/A3-qRT-R                  | 5'- GTTCTCCACAACCGCTTGGT-3'                                         |
| Complementation or overexpressing constructs    |                                |                                                                     |
| <i>ABCG9</i> complementation only               | Sal I - <i>ABCG9</i> proF      | 5'- <u>GTCGAC</u> -TCGAGAACCTACAAATAACAAGGT-3'                      |
|                                                 | Sma I - <i>ABCG9</i> proR      | 5'- <u>CCCGGG</u> -CCCCAACAAATGATCGATCTATAAAG-3'                    |
| <i>ABCG9</i> complementation and overexpression | Xba I -Sma I -sGFP F           | 5'- <u>TCTAGA</u> - <u>CCCGGG</u> -ATGGTGAGCAAGGGCGAGGAGC-3'        |
|                                                 | BamHI I -Ssp I -5G-sGFP R      | 5'- <u>GGATCC</u> - <u>AATATT</u> -G GCC ACC TCC ACC TCC-CTTGTAC-3' |
|                                                 | Sac I -Sma I - <i>ABCG9g</i> F | 5'- <u>GAGCTC</u> - <u>CCCGGG</u> -GG ATGGATAATCAAGAGGTTTCTAT-3'    |
|                                                 | Pml I -Xho I - <i>ABCG9g</i> R | 5'- <u>CACGTG</u> - <u>CTCGAG</u> -TATGCACCACAAATTCGTACGCA-3'       |
| <i>ABCG31</i> overexpression                    | Nar I -sGFP F                  | 5'- <u>GGCGCC</u> -ATGGTGAGCAAGGGCGAGGAGC-3'                        |
|                                                 | BglII-Spe I -5G-sGFP R         | 5'- <u>AGATCT</u> - <u>ACTAGT</u> -GCC ACC TCC ACC TCC-CTTGTAC-3'   |
|                                                 | Xba I - <i>ABCG31</i> F        | 5'-AA <u>TCTAGA</u> -ATGGCGGCGGCTTGAATGG-3'                         |
|                                                 | BamHI I - <i>ABCG31</i> R      | 5'-AA <u>GGATCC</u> TCCTCTTCTC TGGAAGTTGA-3'                        |
|                                                 | 31LP1                          | 5'-TGTCTCTGAAACAGAACCT-3'                                           |
|                                                 | attB3- <i>ABCG31gR</i>         | 5'-GGGGACAACCTTTGTATAATAAAGTTGGTGAAGAGATCTTCGATGGGTCTCT-3'          |

Supplemental Table 3. Constructs

| Use                     | Construct             | Plasmid name                 | Insert or PCR product                                 | Description                                                               | Primers                                          | Template                                                                                   | Plasmid backbone                             | Cloning method                          |
|-------------------------|-----------------------|------------------------------|-------------------------------------------------------|---------------------------------------------------------------------------|--------------------------------------------------|--------------------------------------------------------------------------------------------|----------------------------------------------|-----------------------------------------|
| Promoter-GUS expression | ABCG9pro:GUS          | Teasy-ABCG9pro               | ABCG9 promoter                                        | Upstream sequence                                                         | Sal I -ABCG9 proF<br>Sma I -ABCG9 proR           | Arabidopsis genomic DNA                                                                    | pGEM-T Easy Vector (Promega)                 | TA cloning                              |
|                         |                       | pBIABCG9pro-GUS              | ABCG9 promoter                                        | -                                                                         | -                                                | Teasy-ABCG9pro                                                                             | pBI101.2                                     | Sall/Smal                               |
|                         | ABCG31pro:GUS         | pCR-topo-ABCG31pro           | ABCG31 promoter                                       | upstream sequence ~ part of the second exon                               | ABCG31 Pro-F<br>ABCG31 Pro-R                     | Arabidopsis genomic DNA                                                                    | pCR8-GW-TOPO (Invitrogen)                    | Topo-isomerase                          |
|                         |                       | pMDCABCG31pro-GUS            | ABCG31 promoter                                       | -                                                                         | -                                                | pCR-topo-ABCG31pro                                                                         | pMDC163 (Curtis and Grossniklaus, 2003)      | Gateway LR                              |
| ABCG9 overexpression    | 35Spro:sGFP:ABCG9     | Teasy-ABCG9 gDNA             | ABCG9 genomic DNA                                     | ORF+3'-untranslated region                                                | Sac I -Sma I -ABCG9g F<br>Pml I -Xho I -ABCG9g R | Arabidopsis genomic DNA                                                                    | pGEM-T Easy vector                           | TA cloning                              |
|                         |                       | Teasy-sGFP                   | sGFP (green fluorescent protein)                      | sGFP with X 5 linker sequence                                             | Xba I -Sma I -sGFP F<br>BamH I -Ssp I -5G-sGFP R | p326 sGFP-3G (pUC vector based, kindly provided by professor Inhwan Hwang, POSTECH, Korea) | pGEM-T Easy vector                           | TA cloning                              |
|                         |                       | pPZP221-35S-sGFP-ABCG9g-nosT | ABCG9 genomic DNA<br>sGFP                             | -                                                                         | -                                                | Teasy-ABCG9 gDNA<br>Teasy-sGFP                                                             | pPZP221-35S-nosT (Hajdukiewicz et al., 1994) | appropriate restriction enzymes         |
|                         | ABCG9 complementation | ABCG9pro:sGFP:ABCG9          | pPZP221-ABCG9pro<br>pPZP221-ABCG9pro-sGFP-ABCG9g-nosT | ABCG9 promoter<br>ABCG9 promoter                                          | -<br>-                                           | -<br>-                                                                                     | Teasy-ABCG9pro<br>pPZP221-ABCG9pro           | pPZP221<br>pPZP221-35S-sGFP-ABCG9g-nosT |
| ABCG31 overexpression   | 35Spro:sGFP:ABCG31    | pCR-topo-ABCG31CDS           | ABCG31CDS                                             | Coding sequence                                                           | Xba I -ABCG31 F<br>attB3-ABCG31gR                | Arabidopsis cDNA                                                                           | pCR8-GW-TOPO                                 | Topo-isomerase                          |
|                         |                       | pCR-topo-ABCG31CDS partUTR   | ABCG31CDS part                                        | Part of coding sequence containing the last intron+3'-untranslated region | 31 LP1<br>attB3-ABCG31gR                         | Arabidopsis genomic DNA                                                                    | pCR8-GW-TOPO                                 | Topo-isomerase                          |
|                         |                       | pCR-topo-ABCG31CDSUTR        | ABCG31CDS part                                        | Coding sequence containing the last intron+3'-untranslated region         | -                                                | pCR-topo-ABCG31CDS partUTR                                                                 | pCR-topo-ABCG31CDS                           | appropriate restriction enzymes         |
|                         |                       | pCR-topo-sGFP                | sGFP                                                  | sGFP with X 5 linker sequence                                             | Nar I -sGFP F<br>BglII-Spe I -5G-sGFP R          | p326 sGFP-3G                                                                               | pCR8-GW-TOPO                                 | Topo-isomerase                          |
|                         |                       | pCR-topo-sGFP-ABCG31CDSUTR   | sGFP                                                  | -                                                                         | -                                                | pCR-topo-sGFP                                                                              | pCR-topo-ABCG31CDSUTR                        | appropriate restriction enzymes         |
|                         |                       | pMDC32-sGFP-ABCG31CDSUTR     | sGFP-ABCG31CDSUTR                                     | -                                                                         | -                                                | pCR-topo-sGFP-ABCG31CDSUTR                                                                 | pMDC32 (Curtis and Grossniklaus, 2003)       | Gateway LR                              |

## Supplemental Methods

### Comparison of the steryl glycoside content on the surface of individual pollen and leaf cells

Steryl glycosides are known to be mainly localized to the plasma membrane; thus, if steryl glycosides are also present as normal components of the pollen coat, pollen should have a much higher steryl glycoside content per unit surface area of the cell than other types of cells, such as leaf cells. To evaluate this possibility, we sought to compare the steryl glycoside content per unit surface area of pollen versus that of leaf cells. Whereas the steryl glycoside content per dry weight was known, the number of cells per unit weight was not. We thus estimated steryl glycoside content based on the volume of the cells.

First, we converted the steryl glycoside content per unit dry weight into a value per unit fresh weight, because we reasoned that the cell volume is better correlated with fresh weight than with dry weight, which is obtained from tissues that have been deformed during the drying process. Water accounts for 90% of the total volume of a leaf cell and for 50% of that of a pollen, which is already dehydrated (Barnaba, 1985). Since the steryl glycoside content was 25 and 70  $\mu\text{g}/100\text{ mg}$  of the dry weight of leaves and pollen, respectively (Figure 8, DeBolt et al., 2009), the corresponding values in fresh weight were 2.5 and 35  $\mu\text{g}/100\text{ mg}$  of fresh weight, respectively.

Next, we calculated the total surface area of leaf and pollen cells occupying a given space. Assuming that a cell is spherical, we used the equation for the surface area of a sphere,  $S = 4\pi r^2$ , to obtain the cell surface area. The total surface area of the cells in a space can be obtained by multiplying the surface area of each cell by the number of cells (N) in the space. Fewer large cells occupy a given space than small



cells. Thus, the number of cells in a specific volume is  $N=1/(V \text{ of each cell})$ . The  $V$  of each cell was estimated to be the  $V$  of a sphere,  $\frac{4}{3}\pi r^3$ . Thus, the total surface area is  $S_{\text{total}} = S_{\text{single cell}} \times N = 4\pi r^2 \times 1/(\frac{4}{3}\pi r^3) = 3/r$ . The average radius,  $r$ , of a leaf mesophyll cell and a pollen grain is 25 and 10  $\mu\text{m}$ , respectively. Finally, to calculate the steryl glycoside content per unit surface area, the content was divided by the surface area. Thus, the ratio of steryl glycoside content in leaf cells to that in pollen is  $2.5/(\frac{3}{25}):35/(\frac{3}{10})$ , which is equal to 1:5.6. Therefore, a pollen grain is estimated to contain 5.6 times more steryl glycosides at the plasma membrane and on the surface than does a leaf cell.

### Supplemental References

- Barnaba, B.** (1985). Effect of water loss on germination ability of maize (*Zea mays L.*) pollen. *Ann. Bot.* **55**: 201-204.
- Curtis, M.D., and Grossniklaus, U.** (2003). A Gateway cloning vector set for high-throughput functional analysis of genes in planta. *Plant Physiol.* **133**: 462-469.
- DeBolt, S., Scheible, W.R., Schrick, K., Auer, M., Beisson, F., Bischoff, V., Bouvier-Nave, P., Carroll, A., Hematy, K., Li, Y., Milne, J., Nair, M., Schaller, H., Zemla, M., and Somerville, C.** (2009). Mutations in UDP-Glucose:sterol glucosyltransferase in *Arabidopsis* cause transparent testa phenotype and suberization defect in seeds. *Plant Physiol.* **151**: 78-87.
- Hajdukiewicz, P., Svab, Z., and Maliga, P.** (1994). The small, versatile pPZP family of *Agrobacterium* binary vectors for plant transformation. *Plant Mol. Biol.* **25**: 989-994.
